# Supplementary material for: High intrinsic catalytic activity of two-dimensional boron monolayers for the hydrogen evolution reaction
Source: Royal Society of Chemistry journal article supplement (doi:10.1039/c6nr06621f), 2016-12-06
Supplement: c6nr06621f1.pdf [file c6nr06621f1.pdf]

## Supplementary Information for:

## High Intrinsic Catalytic Activity of Two-Dimensional Boron

## Monolayers for Hydrogen Evolution Reaction

Li Shi<sup>a#</sup>, Chongyi Ling<sup>a#</sup>, Yixin Ouyang<sup>a</sup> and Jinlan Wang<sup>\*a,b</sup>

<sup>a</sup> Department of Physics, Southeast University, Nanjing 211189, China

<sup>b</sup> Synergetic Innovation Center for Quantum Effects and Applications (SICQEA),

Hunan Normal University, Changsha 410081, China

#These authors contributed equally to this work

\*Corresponding Author: [jlwang@seu.edu.cn](mailto:jlwang@seu.edu.cn)

**Table S1.** The H-adsorption free energy ( $\Delta G_H$ ) of  $\beta_{12}$  and trigonal BM with respect to H coverage.

| $\beta_{12}$ BM |                   |                   | Trigonal BM |                   |                   |
|-----------------|-------------------|-------------------|-------------|-------------------|-------------------|
| H-coverage      | $\Delta E_H$ (eV) | $\Delta G_H$ (eV) | H-coverage  | $\Delta E_H$ (eV) | $\Delta G_H$ (eV) |
| 1/12            | -0.19             | 0.11              | 1/18        | -0.78             | -0.48             |
| 3/12            | -0.19             | 0.11              | 2/18        | -0.71             | -0.41             |
| 6/12            | -0.18             | 0.12              | 3/18        | -0.36             | -0.06             |
| 9/12            | 0.03              | 0.33              | 5/18        | -0.16             | 0.14              |

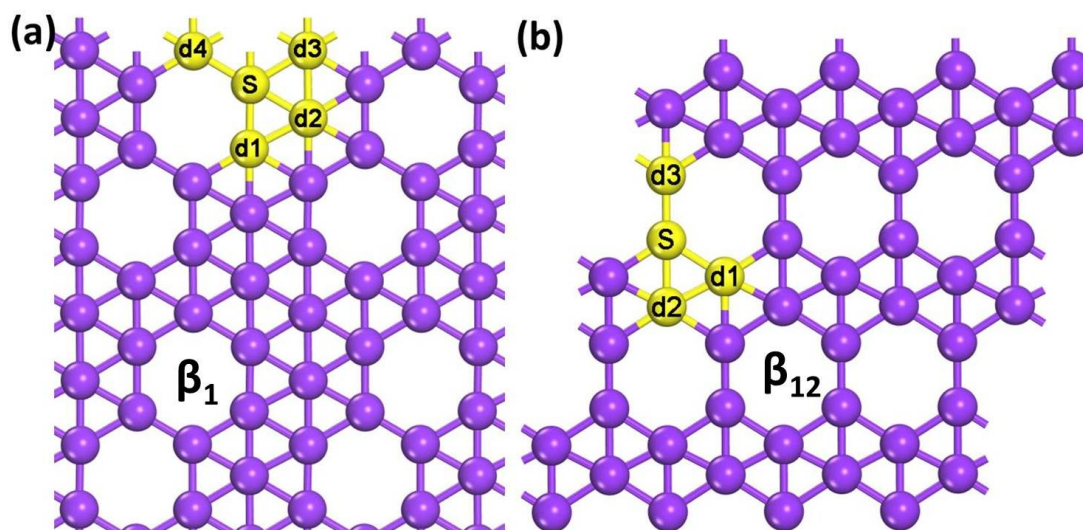

**Figure S1.** The structures of (a)  $\beta_1$  and (b)  $\beta_{12}$ , respectively as well as the possible desorption paths for  $B_2H_6$  on BMs:  $\beta_1$ -S-d1,  $\beta_1$ -S-d2,  $\beta_1$ -S-d3,  $\beta_1$ -S-d4 and  $\beta_{12}$ -S-d1,  $\beta_{12}$ -S-d2,  $\beta_{12}$ -S-d3 for  $\beta_1$  and  $\beta_{12}$  BMs, respectively.

**Table S2.** The calculated free energy difference ( $\Delta G$ ) between the formation of  $H_2$  and  $B_2H_6$  on the BMs.

| Compound                      | defect type | $\Delta G_H$ (eV) | $\Delta G$ (eV) <sup>1</sup> |
|-------------------------------|-------------|-------------------|------------------------------|
| $\beta_1$ -boron monolayer    | S-d1        | 0.10              | -1.97                        |
|                               | S-d2        |                   | -3.23                        |
|                               | S-d3        |                   | -2.12                        |
|                               | S-d4        |                   | -2.02                        |
| $\beta_{12}$ -boron monolayer | S-d1        | 0.01              | -3.65                        |
|                               | S-d2        |                   | -3.88                        |
|                               | S-d3        |                   | -1.60                        |

<sup>1</sup>  $\Delta G$  is calculated by:  $\Delta G = \Delta G_{(3H_2)} - \Delta G_{(B_2H_6)}$ , where the  $\Delta G_{(3H_2)}$  or  $\Delta G_{(B_2H_6)}$  is the formation free energy of 3  $H_2$  or 1  $B_2H_6$  molecule on the BM, respectively.

**Table S3.** The comparison of the calculated free energy of hydrogen adsorption by using PBE-GGA with and without D2 correction. The effect of weak interaction on free-standing BMs is negligible as the DFT-D2 and DFT give very similar results.

| $\Delta G_H$ (eV)               | PBE-GGA | PBE-GGA with D2 | PBE-GGA with D2 |
|---------------------------------|---------|-----------------|-----------------|
| $\beta_{12}$ -S1                | 0.10    | 0.13            |                 |
| $\chi_3$ -S1                    | 0.03    | 0.05            |                 |
| $\beta_{12}$ @Ag-S <sub>1</sub> | -0.34   | -0.01           | 0.02            |
| $\beta_{12}$ @Ag-S <sub>3</sub> | -0.31   | -0.13           | -0.10           |

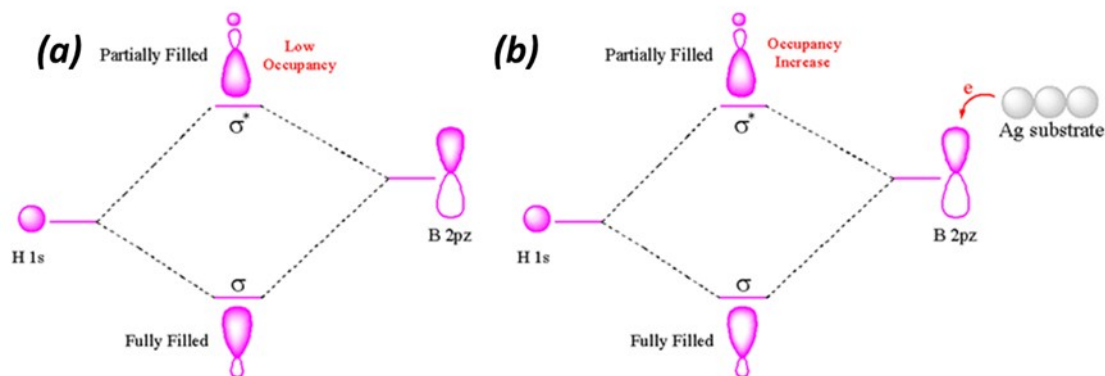

**Figure S2.** (a) The combination of H 1s orbital and B 2pz orbital forms a fully filled bonding orbital and a partially filled anti-bonding orbital. (b) Charge transfer from Ag to BM will occur when the BM is placed on the Ag substrate. The extra electron gained from Ag will occupy the anti-bonding orbital, leading to weaker H-B bonding strengths and a more positive  $\Delta G_H$ .
